# Supplementary material for: Insights into the Mechanism of Action of Bactericidal Lipophosphonoxins
Source: PubMed Central journal article supplement (PMC4696656; doi:10.1371/journal.pone.0145918), 2015-12-30
Supplement: pone.0145918.s003.pdf [file pone.0145918.s003.pdf]

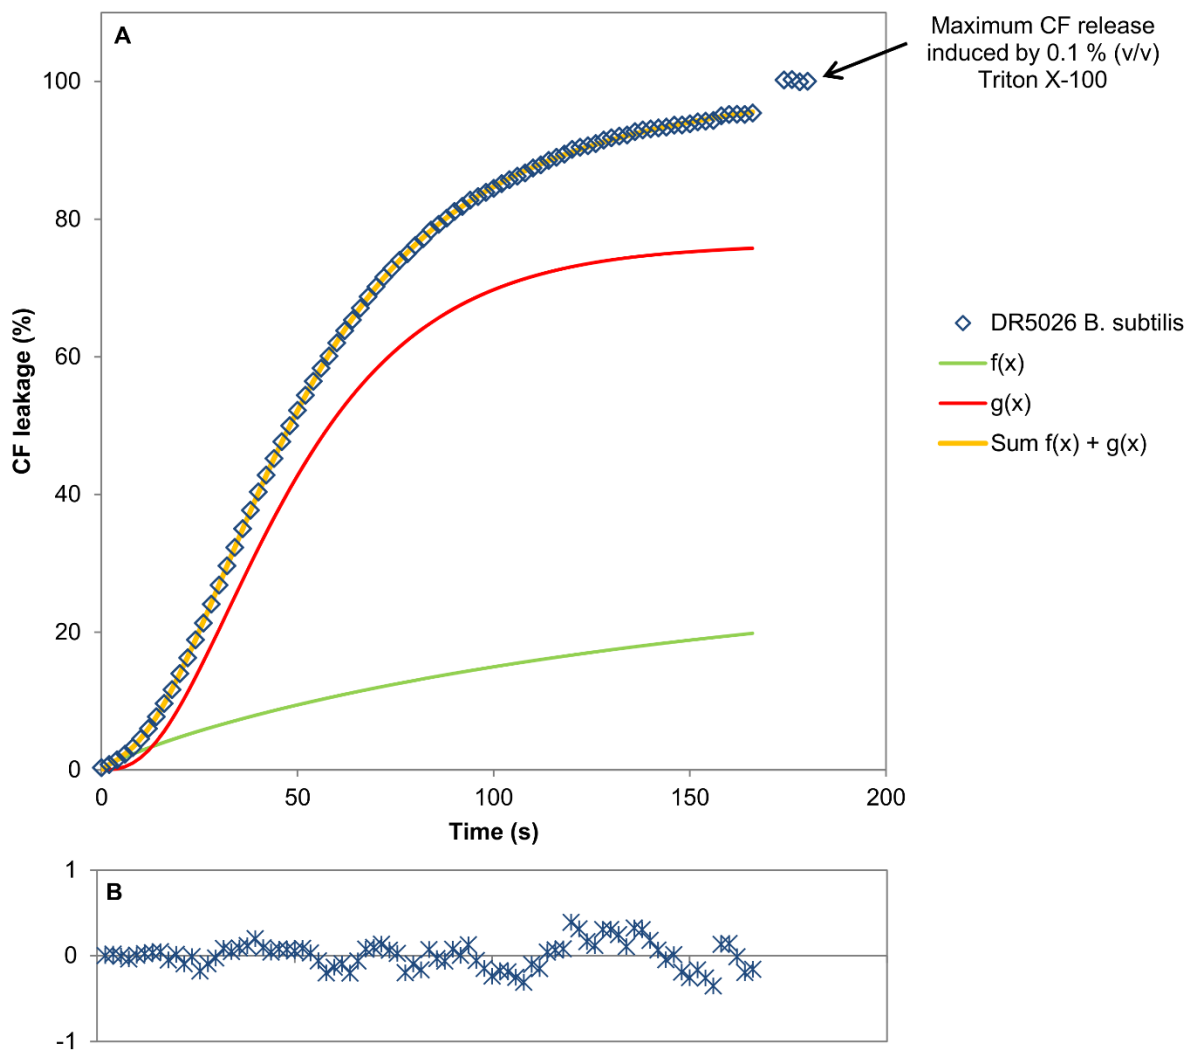

**S3 Fig. CF release curve fitting.** Time course of liposome lysis induced by **DR5026** (A). Solid lines show the fit of the functions:  $\alpha(1-\exp(-t/\tau))^n$  to the data. Leakage of liposomes prepared from the bacterial phospholipids exhibited a biphasic behavior – in this data set the parameters for the fit of the initial phase (f(x)) were  $\alpha = 29.7$ ,  $\tau = 175.5$  s,  $n = 0.6$  and for the latter phase (g(x)) were  $\alpha = 76.4$ ,  $\tau = 28.2$  s,  $n = 3.1$ . The difference between the experimental data and the model (sum f(x) and g(x)) is shown in (B).
