# Supplementary material for: Insights into the Mechanism of Action of Bactericidal Lipophosphonoxins
Source: PubMed Central journal article supplement (PMC4696656; doi:10.1371/journal.pone.0145918), 2015-12-30
Supplement: pone.0145918.s004.pdf [file pone.0145918.s004.pdf]

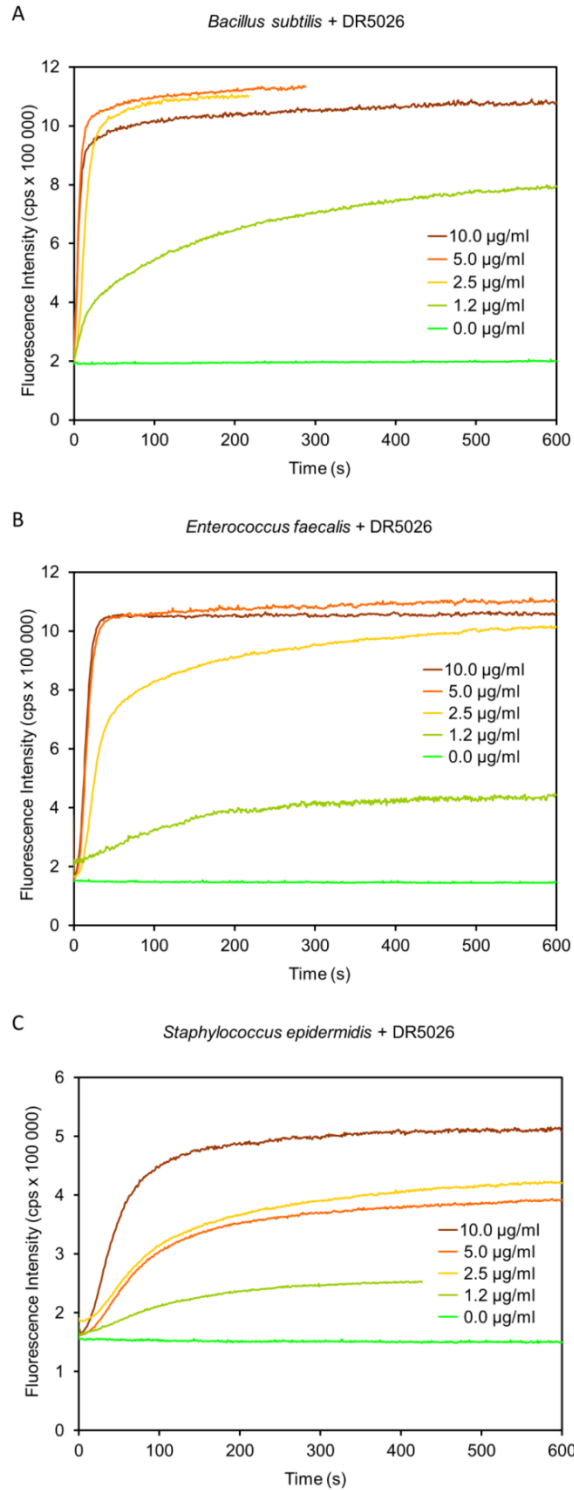

**S4 Fig. Concentration-dependent cytoplasmic membrane permeabilization induced by DR5026.** The increase in fluorescence intensity reflected intercalation of PI into DNA and dsRNA that occurred after PI entry into the cell upon membrane permeabilization.
