# Supplementary material for: Insights into the Mechanism of Action of Bactericidal Lipophosphonoxins
Source: PubMed Central journal article supplement (PMC4696656; doi:10.1371/journal.pone.0145918), 2015-12-30
Supplement: pone.0145918.s009.pdf [file pone.0145918.s009.pdf]

**S1 Table Antibacterial activity of LPPOs DR5557, DR5690, and DR5823**

|                                       | MIC $\mu\text{g/ml}$ |        |        |
|---------------------------------------|----------------------|--------|--------|
|                                       | DR5557               | DR5690 | DR5823 |
| <i>Enterococcus faecalis</i> CCM 4224 | 6.25                 | >200   | 6.25   |
| <i>Staphylococcus aureus</i> CCM 4223 | 3.125                | >200   | 25     |
| <i>Bacillus subtilis</i>              | 3.125                | 50     | 12.5   |
| <i>Streptococcus agalactiae</i>       | 6.25                 | 12.5   | 3.125  |
| <i>S. aureus</i> MRSA 4591            | 6.25                 | >200   | 25     |
| <i>S. haemolyticus</i> 16568          | 6.25                 | >200   | >200   |
| <i>E. faecium</i> VanA 419/ana        | 25-12.5              | >200   | 6.25   |
| <i>S. epidermidis</i> 8700/B          | 3.125                | 25     | 6.25   |
