# Supplementary material for: Insights into the Mechanism of Action of Bactericidal Lipophosphonoxins
Source: PubMed Central journal article supplement (PMC4696656; doi:10.1371/journal.pone.0145918), 2015-12-30
Supplement: pone.0145918.s010.pdf [file pone.0145918.s010.pdf]

**S2 Table. The induction of resistance of *Enterococcus faecalis* and *Streptococcus agalactiae* to compounds DR5047 and DR5026.** Minimum inhibitory concentrations of the tested LPPOs after each induction step. The induction of resistance was carried out by repeated passages of *E. faecalis* and *S. agalactiae* strains with subinhibitory concentrations of the relevant LPPOs. A total of 14 passages were performed. The results clearly showed that the MICs remained relatively unchanged. It meant that the resistance was not induced.

| Step | MIC (mg/L)                      |               |                                       |               |
|------|---------------------------------|---------------|---------------------------------------|---------------|
|      | <i>Streptococcus agalactiae</i> |               | <i>Enterococcus faecalis</i> CCM 4224 |               |
|      | <b>DR5026</b>                   | <b>DR5047</b> | <b>DR5026</b>                         | <b>DR5047</b> |
| 1    | 3.1                             | 6.2           | 6.2                                   | 12.5          |
| 2    | 3.1                             | 6.2           | 6.2                                   | 12.5          |
| 3    | 3.1                             | 6.2           | 6.2                                   | 12.5          |
| 4    | 3.1                             | 6.2           | 6.2                                   | 12.5          |
| 5    | 3.1                             | 6.2           | 6.2                                   | 25            |
| 6    | 3.1                             | 6.2           | 12.5                                  | 25            |
| 7    | 6.2                             | 3.1           | 12.5                                  | 25            |
| 8    | 6.2                             | 6.2           | 12.5                                  | 25            |
| 9    | 3.1                             | 6.2           | 12.5                                  | 25            |
| 10   | 3.1                             | 6.2           | 12.5                                  | 50            |
| 11   | 3.1                             | 6.2           | 12.5                                  | 25            |
| 12   | 6.2                             | 6.2           | 12.5                                  | 25            |
| 13   | 6.2                             | 6.2           | 12.5                                  | 25            |
| 14   | 6.2                             | 6.2           | 12.5                                  | 25            |
